# Supplementary material for: VPAC1 receptor (Vipr1)-deficient mice exhibit ameliorated experimental autoimmune encephalomyelitis, with specific deficits in the effector stage
Source: J Neuroinflammation. 2016 Jun 29;13:169. doi: 10.1186/s12974-016-0626-3 (PMC4928347; doi:10.1186/s12974-016-0626-3)
Supplement: Additional file 1: Table S1. — Oligonucleotide primers used for real-time PCR (PDF 236 kb) [file 12974_2016_626_MOESM1_ESM.pdf]

**Supplementary table 1. Oligonucleotide primers used for Real time PCR**

| Gene                  | GenBank<br>Accession<br>Number | Primer Sequence                |                                 |
|-----------------------|--------------------------------|--------------------------------|---------------------------------|
|                       |                                | Sense                          | Antisense                       |
| Chemokines            |                                |                                |                                 |
| IP-10/CXCL10          | NM_021274                      | 5'-TGCTGGGTCTGAGTGGGACT-3'     | 5'-CCCTATGGCCCTCATTCTCAC-3'     |
| MCP-1/CCL2            | NM_011333                      | 5'-AAAAACCTGGATCGGAACCAA-3'    | 5'-CGGGTCAACTTCACATTCAAAG-3'    |
| MCP-2 /CCL8           | NM_021443                      | 5'-GGGTGCTGAAAAGCTACGAG-3'     | 5'-TCCAGCTTTGGCTGTCTCTT-3'      |
| MIG/CXCL9             | NM_008599                      | 5'-TCTGCCATGAAGTCCGCTG-3'      | 5'-CAGGAGCATCGTGCATTCT-3'       |
| MIP-3 $\alpha$ /CCL20 | NM_016960                      | 5'-CAAGCGTCTGCTCTTCCTTG-3'     | 5-TGGATCAGCGCACACAGATT-3'       |
| RANTES/CCL5           | NM_013653                      | 5'-ACACCACTCCCTGCTGCTTT-3'     | 5'-GACTGCAAGATTGGAGCACTTG-3'    |
| Chemokine receptors   |                                |                                |                                 |
| CCR1                  | NM_009912                      | 5-CCATCCACAGGAGAACATG-3'       | 5-GCCCCATTTTGTTTATTCA-3'        |
| CCR2                  | NM_009915                      | 5-AAAGGAAATGGAAGACAATAATATG-3' | 5-AAAGGCCAAACTGTCACTTACTTTAC-3' |
| CCR5                  | NM_009917                      | 5-TGGCTTCTCCACACAAACAA-3'      | 5-CGGAGCTTGAGAAAAACCAG-3'       |
| Adhesion molecules    |                                |                                |                                 |
| ICAM-1                | NM_010493                      | 5'-CATCCCAGAGAAGCCTTCCTG-3'    | 5'-TCAGCCACTGAGTCTCCAAGC-3'     |
| VCAM-1                | NM_011693                      | 5'-AACGACCTTCATCCCCACC-3'      | 5'-TCTGCCTCTGTTTGGGTTCAG-3'3'   |
| Cytokines             |                                |                                |                                 |
| IFN $\gamma$          | NM_008337                      | 5'-TGCTGATGGGAGGAGATGTCT-3'    | 5'-TTTCTTTCAGGGACAGCCTGTT-3'    |
| IL-4                  | NM_021283                      | 5'-CGAGGTCACAGGAGAAGGGA-3'     | 5'-AAGCCCTACAGACGAGCTCACT-3'    |
| IL-6                  | NM_010551                      | 5'-TTCCATCCAGTTGCCTTCTTG-3'    | 5'-TTGGGAGTGGTATCCTCTGTGA-3'    |
| IL-10                 | NM_010548                      | 5'-GGTTGCCAAGCCTTATCGGA-3'     | 5'-ACCTGCTCCACTGCCTTGCT-3'      |
| IL-17A                | NM_010552                      | 5'-GAAGCTCAGTGCCGCCA-3'        | 5'-TTCATGTGGTGGTCCAGCTTT-3'     |
| IL-23p19              | NM_031252                      | 5'-CCAGCAGCTCTCTCGGAATC-3'     | 5'-TCATATGTCCCGCTGGTGC-3'       |
| TNF $\alpha$          | NM_013693                      | 5'-CGATCACCCCGAAGTTCAGTA-3'    | 5'-GGTGCCTATGTCTCAGCCTCTT-3'    |
| Transcription factors |                                |                                |                                 |
| Foxp3                 | NM_054039                      | 5'-GGCCCTTCTCCAGGACAGA-3'      | 5'-CTGATCATGGCTGGGTTGT-3'       |
| Housekeeping Gene     |                                |                                |                                 |
| HPRT                  | NM_013556                      | 5'-TGGTGAAAAGGACCTCTCGAA-3'    | 5'-TCAAGGGCATATCCAACAACA-3'     |

The amplification protocols used were: initial denaturation at 96°C for 5 min for all and 40 cycles of: 96°C for 25 secs followed by 60°C for 35 secs, and 72°C for 35 secs for IFN $\gamma$ , IL-4, MCP-1, ICAM, VCAM, CCR1, CCR5; 96°C for 20 secs, 60°C for 30 secs, and 72°C for 20 secs for IL-6, IL-10, IL-17A, IL-23p19, RANTES and MIP-3 $\alpha$ ; 96°C for 20 secs, 62°C for 30 secs, and 72°C for 20 secs for TNF $\alpha$ , MIG and IP-10 and 95°C for 1 min, 60°C for 1 min and 72°C for 1 min for Foxp3 and CCR2, with a final elongation at 72°C for 10 min for all.

## **Supplementary Figure legends**

**Supplementary Figure 1. Effects of a VPAC1 agonist or antagonist treatment started on early EAE.** EAE was induced by immunizing mice subcutaneously with 100  $\mu$ g of MOG<sub>35-55</sub> in CFA supplemented with *Mycobacterium tuberculosis*, and EAE clinical scores were monitored daily on a scale of 0 to 4 as described in the *Methods* section. The clinical curve displays the mean clinical scores  $\pm$  SEM of immunized WT mice treated with PBS, the VPAC1 antagonist PG97-269 at 10 nmoles per mouse or the VPAC1 agonist (Ala<sup>11, 22, 28</sup>)VIP at 5 nmoles per mouse for five consecutive days starting on day 3 (indicated by the arrow). A representative experiment out of two is shown (n=10 for each group).

**Supplementary Figure 2. Early chemokine expression in the CNS of EAE immunized mice is reduced in VPAC1 KO mice.** EAE was induced in WT and VPAC1 deficient mice and spinal cords were collected and fresh-frozen in liquid nitrogen on day 5. RNA was extracted and retrotranscribed to cDNA, and the levels of expression of IP-10, MIG, MIP-3 $\alpha$  and RANTES determined by real time RT-PCR as described in the *Methods* sections. Results shown are representative of two independent experiments of n = 8 mice/group., \*\*p<0.01, \*\*\*p<0.001, ns=not significant; Student's *t*-test.

**Supplementary Figure 3. Quantification of white blood cell populations in WT and VPAC1 KO mice.** EAE was induced to VPAC1 KO and WT mice, and retro-orbital blood collected at different time points (days 6, 9 and 15). Cells were counted using a xs-800i haematology analyser from Sysmex. N=4 per group.

**Supplementary Figure 4. The total numbers of cells in the draining lymph nodes of WT and VPAC1 KO mice do not differ.** EAE was induced in WT and VPAC1 deficient mice, and the draining lymph nodes isolated at the peak of the disease. Lymph nodes from naïve animals served as controls. A cell suspension was prepared by tapping the organs through a 40 µm nylon mesh, and cells counted with a hemocytometer (n=5 for each group).
