# Supplementary material for: VPAC1 receptor (Vipr1)-deficient mice exhibit ameliorated experimental autoimmune encephalomyelitis, with specific deficits in the effector stage
Source: Springer Nature journal article supplement (doi:10.1186/s12974-016-0626-3), 2016-06-29

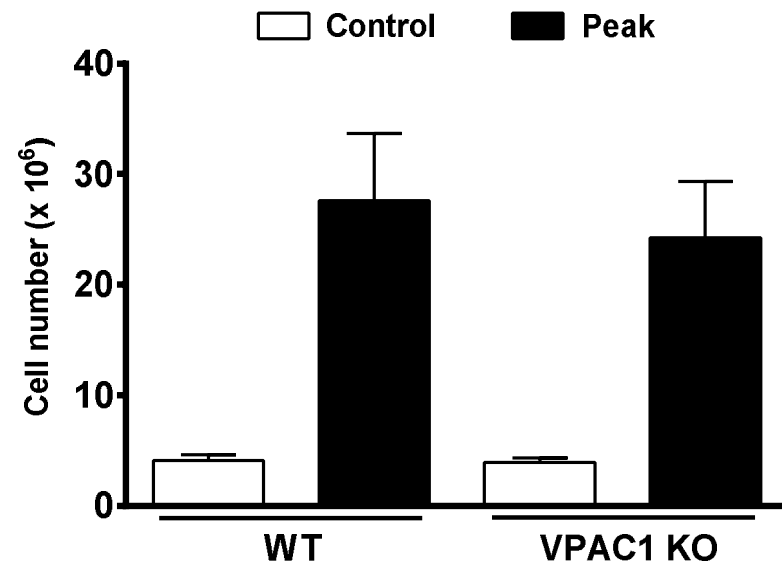

Supplement: MOESM5 [file 10305340]
